# Supplementary material for: The costs of suboptimal breastfeeding in Ontario, Canada, and potential healthcare resource impacts from improving rates: a pediatric health system costing analysis
Source: Int Breastfeed J. 2025 Feb 22;20:9. doi: 10.1186/s13006-025-00702-y (PMC11846301; doi:10.1186/s13006-025-00702-y)
Supplement: Supplementary file 4 — Additional file 4. Results of review C. The results of Review C. [file 13006_2025_702_MOESM4_ESM.xlsx]

## Sheet: Sheet1
First Author	Title	Authors	Citation	Journal/Book	Publication Year	DOI	DataBase	Areas covered/Populations	CHILD_GastroInfections	CHILD_Lower Respiratory Infections/Bronchopulmonary Dysplasia	CHILD_OtitisMedia	CHILD_NecrotisingEnt	CHILD_Cognitive	CHILD_SIDS	CHILD_Obesity/Composition/Growth	CHILD_Leukaemia	CHILD_Crohns/Colitis	CHILD_Disease/Morbidity	CHILD_hospitalization	CHILD_pneumonia	CHILD_mortality	CHILD_general health	CHILD_sepsis (late onset)	CHILD_neonatal opioid withdrawal	CHILD_atopic dermatitis	CHILD_asthma	CHILD_Type II diabetes	CHILD_severe brain injury	Child-blood pressure	Mother_BreastCancer	Mother_OvarianCancer	Mother_Type2Diabetes	Mother_Myocardial Infarction	Mother_Hypertension	Mother_Mortality	Mother_Morbidity	Mother_Arthritis
Avram CM	A Cost-Effectiveness Analysis of Rooming-in and Breastfeeding in Neonatal Opioid Withdrawal	Avram, C. M., Yieh, L., Dukhovny, D., & Caughey, A. B.	Avram, C. M., Yieh, L., Dukhovny, D., & Caughey, A. B. (2020). A Cost-Effectiveness Analysis of Rooming-in and Breastfeeding in Neonatal Opioid Withdrawal. American journal of perinatology, 37(1), 1–7. https://doi.org/10.1055/s-0039-1693716	American journal of perinatology	2020	https://doi.org/10.1055/s-0039-1693716	PubMed	United States																1
Ball	Health Care Costs of Formula-feeding in the First Year of Life	Ball, T & Wright, A	Ball, T. M., & Wright, A. L. (1999). Health care costs of formula-feeding in the first year of life. Pediatrics, 103(Supplement_1), 870-876.	Pediatrics	1999	https://doi.org/10.1542/peds.103.S1.8700	Renfrew et al 2012 study reference	US	1	1	1
Bartick M	Cost analysis of maternal disease associated with suboptimal breastfeeding.	Bartick M., Stuebe AM, Schwarz EB, Luongo C, Reinhold AG, Foster EM	Bartick, M. C., Stuebe, A. M., Schwarz, E. B., Luongo, C., Reinhold, A. G., & Foster, E. M. (2013). Cost analysis of maternal disease associated with suboptimal breastfeeding. Obstetrics and gynecology, 122(1), 111–119. https://doi.org/10.1097/AOG.0b013e318297a047	Obstetrics and Gynecology	2013	10.1097/AOG.0b013e318297a047	PubMed	United States																						1	1	1	1	1
Bartick M	The burden of suboptimal breastfeeding in the United States: A pediatric cost analysis	Bartick, M & Reinhold, A	Bartick, M., & Reinhold, A. (2010). The burden of suboptimal breastfeeding in the United States: a pediatric cost analysis. Pediatrics, 125(5), e1048-e1056.	Pediatrics	2010	DOI: 10.1542/peds.2009-1616	Renfrew et al 2012 study reference	US	1	1	1	1		1	1	1									1	1	1
Barton	Clinical and Economic Outcomes of Infants Receiving Breast Milk in the NICU	Barton, AJ, Danek, G, & Owens, B	Barton AJ, Danek G, Owens B. Clinical and economic outcomes of infants receiving breast milk in the NICU. Journal for Specialists in Pediatric Nursing. 2001 Jan;6(1):5-10.	Journal for Specialists in Pediatric Nursing	2001	https://doi.org/10.1111/j.1744-6155.2001.tb00113.x	Renfrew et al 2012 study reference	US											1
Buchner	Health gain and economic evaluation of breastfeeding policies: Model simulation	Buchner FL, Hoekstra J, Van Rossum CT	Buchner FL, Hoekstra J, Van Rossum CT. Health gain and economic evaluation of breastfeeding policies: Model simulation. RIVM Rapport 350040002. 2007 Sep 21.	Report for Ministry of Public Health, Welfare and Sports, Netherlands	2008		Renfrew et al 2012 study reference	Netherlands	1		1				1														1								1
Cattaneo	Infant feeding and cost of health care: A cohort study	Cattaneo A, Ronfani L, Burmaz T, Quintero‐Romero S, MacAluso A, Di Mario S	Cattaneo A, Ronfani L, Burmaz T, Quintero‐Romero S, MacAluso A, Di Mario S. Infant feeding and cost of health care: a cohort study. Acta paediatrica. 2006 May;95(5):540-6.	Acta paediatrica	2006	https://doi.org/10.1111/j.1651-2227.2006.tb02281.xx	Renfrew et al 2012 study reference	Italy										1	1
Colaizy TT	Impact of Optimized Breastfeeding on the Costs of Necrotizing Enterocolitis in Extremely Low Birthweight Infants	Colaizy, T. T., Bartick, M. C., Jegier, B. J., Green, B. D., Reinhold, A. G., Schaefer, A. J., Bogen, D. L., Schwarz, E. B., Stuebe, A. M., & Eunice Kennedy Shriver National Institute of Child Health and Human Development Neonatal Research Network	Colaizy, T. T., Bartick, M. C., Jegier, B. J., Green, B. D., Reinhold, A. G., Schaefer, A. J., Bogen, D. L., Schwarz, E. B., Stuebe, A. M., & Eunice Kennedy Shriver National Institute of Child Health and Human Development Neonatal Research Network (2016). Impact of Optimized Breastfeeding on the Costs of Necrotizing Enterocolitis in Extremely Low Birthweight Infants. The Journal of pediatrics, 17…	The Journal of Pediatrics	2016	10.1016/j.jpeds.2016.03.040	PubMed	United States				1
Colchero MA	The costs of inadequate breastfeeding of infants in Mexico	Colchero, M. A., Contreras-Loya, D., Lopez-Gatell, H., & González de Cosío, T.	Colchero, M. A., Contreras-Loya, D., Lopez-Gatell, H., & González de Cosío, T. (2015). The costs of inadequate breastfeeding of infants in Mexico. The American journal of clinical nutrition, 101(3), 579–586. https://doi.org/10.3945/ajcn.114.092775	The American journal of clinical nutrition	2015	10.3945/ajcn.114.092775	PubMed	Mexico	1	1	1	1		1
Hoey	Economic advantages of breast-feeding in an HMO: setting a pilot study	Hoey C, Ware JL.	Hoey C, Ware JL. Economic advantages of breast-feeding in an HMO: setting a pilot study. Am J Manag Care. 1997 Jun 1;3(6):861-5.	Am J Manag Care	1997		Renfrew et al 2012 study reference	US											1
Johnson TJ	The Economic Impact of Donor Milk in the Neonatal Intensive Care Unit.	Johnson, T. J., Berenz, A., Wicks, J., Esquerra-Zwiers, A., Sulo, K. S., Gross, M. E., Szotek, J., Meier, P., & Patel, A. L.	Johnson, T. J., Berenz, A., Wicks, J., Esquerra-Zwiers, A., Sulo, K. S., Gross, M. E., Szotek, J., Meier, P., & Patel, A. L. (2020). The Economic Impact of Donor Milk in the Neonatal Intensive Care Unit. The Journal of pediatrics, 224, 57–65.e4. https://doi.org/10.1016/j.jpeds.2020.04.044	The Journal of Pediatrics	2020	10.1016/j.jpeds.2020.04.044	PubMed	United States? VLBW infants		1		1											1					1
Keshmiri R	Cost-effectiveness analysis of infant feeding modalities for virally suppressed mothers in Canada living with HIV.	Keshmiri, R., Coyte, P. C., Laporte, A., Sheth, P. M., & Loutfy, M.	Keshmiri, R., Coyte, P. C., Laporte, A., Sheth, P. M., & Loutfy, M. (2019). Cost-effectiveness analysis of infant feeding modalities for virally suppressed mothers in Canada living with HIV. Medicine, 98(23), e15841. https://doi.org/10.1097/MD.0000000000015841	Medicine	2019	10.1097/MD.0000000000015841	PubMed	Canada, virally suppressed mothers living with HIV	1	1	1				1										1	1	1
Lechosa-Muñiz, C.	Health Care Costs Associated to Type of Feeding in the First Year of Life	Lechosa-Muñiz, C., Paz-Zulueta, M., Herrero, M., Rio, E., Sota, S. M., Llorca, J., & Cabero-Perez, M. J.	Lechosa-Muñiz, C., Paz-Zulueta, M., Herrero, M., Rio, E., Sota, S. M., Llorca, J., & Cabero-Perez, M. J. (2020). Health Care Costs Associated to Type of Feeding in the First Year of Life. International journal of environmental research and public health, 17(13), 4719. https://doi.org/10.3390/ijerph17134719	International journal of environmental research and public health	2020	10.3390/ijerph17134719	PubMed	Spain										1	1
Ma P	A case study on the economic impact of optimal breastfeeding	Ma, P., Brewer-Asling, M., & Magnus, J. H.	Ma, P., Brewer-Asling, M., & Magnus, J. H. (2013). A case study on the economic impact of optimal breastfeeding. Maternal and child health journal, 17(1), 9–13. https://doi.org/10.1007/s10995-011-0942-2	Maternal and child health journal	2013	10.1007/s10995-011-0942-2	PubMed	Louisiana, United States	1	1		1		1
Parker LA	Effect of breast milk on hospital costs and length of stay among very low-birth-weight infants in the NICU	Parker, L. A., Krueger, C., Sullivan, S., Kelechi, T., & Mueller, M.	Parker, L. A., Krueger, C., Sullivan, S., Kelechi, T., & Mueller, M. (2012). Effect of breast milk on hospital costs and length of stay among very low-birth-weight infants in the NICU. Advances in neonatal care : official journal of the National Association of Neonatal Nurses, 12(4), 254–259. https://doi.org/10.1097/ANC.0b013e318260921a	Advances in neonatal care : official journal of the National Association of Neonatal Nurses	2012	10.1097/ANC.0b013e318260921a	PubMed	United States, VLBW infants	1			1							1				1
Patel AL	Influence of own mother's milk on bronchopulmonary dysplasia and costs	Patel, A. L., Johnson, T. J., Robin, B., Bigger, H. R., Buchanan, A., Christian, E., Nandhan, V., Shroff, A., Schoeny, M., Engstrom, J. L., & Meier, P. P.	Patel, A. L., Johnson, T. J., Robin, B., Bigger, H. R., Buchanan, A., Christian, E., Nandhan, V., Shroff, A., Schoeny, M., Engstrom, J. L., & Meier, P. P. (2017). Influence of own mother's milk on bronchopulmonary dysplasia and costs. Archives of disease in childhood. Fetal and neonatal edition, 102(3), F256–F261. https://doi.org/10.1136/archdischild-2016-310898	Archives of disease in childhood. Fetal and neonatal edition	2017	10.1136/archdischild-2016-310898	PubMed	United States		1
Pokhrel S	Potential economic impacts from improving breastfeeding rates in the UK	Pokhrel, S., Quigley, M. A., Fox-Rushby, J., McCormick, F., Williams, A., Trueman, P., Dodds, R., & Renfrew, M. J.	Pokhrel, S., Quigley, M. A., Fox-Rushby, J., McCormick, F., Williams, A., Trueman, P., Dodds, R., & Renfrew, M. J. (2015). Potential economic impacts from improving breastfeeding rates in the UK. Archives of disease in childhood, 100(4), 334–340. https://doi.org/10.1136/archdischild-2014-306701	Archives of disease in childhood	2015	10.1136/archdischild-2014-306701	PubMed	UK	1	1	1	1																		1
Renfew	Preventing disease and saving resources: the potential contribution of increasing breastfeeding rates in the UK	Renfrew MJ, Pokhrel S, Quigley M, McCormick F, Fox-Rushby J, Dodds R, Duffy S, Trueman P, Williams A.	Renfrew MJ, Pokhrel S, Quigley M, McCormick F, Fox-Rushby J, Dodds R, Duffy S, Trueman P, Williams A. Preventing disease and saving resources: the potential contribution of increasing breastfeeding rates in the UK.		2012	https://discovery.dundee.ac.uk/ws/files/1290558/Preventing_disease_saving_resources.pdf	Renfrew et al 2012 study reference	UK	1	1	1	1																		1
Riordan	The cost of not breastfeeding: a commentary	Riordan JM.	Riordan JM. The cost of not breastfeeding: a commentary. Journal of Human Lactation. 1997 Jun;13(2):93-7.	Journal of Human Lactation	1997	https://doi.org/10.1177/089033449701300202	Renfrew et al 2012 study reference		1	1	1																1
Rollins NC	Why invest, and what it will take to improve breastfeeding practices?	Rollins, N. C., Bhandari, N., Hajeebhoy, N., Horton, S., Lutter, C. K., Martines, J. C., Piwoz, E. G., Richter, L. M., Victora, C. G., & Lancet Breastfeeding Series Group	Rollins, N. C., Bhandari, N., Hajeebhoy, N., Horton, S., Lutter, C. K., Martines, J. C., Piwoz, E. G., Richter, L. M., Victora, C. G., & Lancet Breastfeeding Series Group (2016). Why invest, and what it will take to improve breastfeeding practices?. Lancet (London, England), 387(10017), 491–504. https://doi.org/10.1016/S0140-6736(15)01044-2	Lancet	2016	10.1016/S0140-6736(15)01044-2	PubMed	US, UK, China, Brazil
Santacruz-Salas E	The Economic Influence of Breastfeeding on the Health Cost of Newborns	Santacruz-Salas, E., Aranda-Reneo, I., Hidalgo-Vega, Á., Blanco-Rodriguez, J. M., & Segura-Fragoso, A.	Santacruz-Salas, E., Aranda-Reneo, I., Hidalgo-Vega, Á., Blanco-Rodriguez, J. M., & Segura-Fragoso, A. (2019). The Economic Influence of Breastfeeding on the Health Cost of Newborns. Journal of human lactation : official journal of International Lactation Consultant Association, 35(2), 340–348. https://doi.org/10.1177/0890334418812026	Journal of human lactation : official journal of International Lactation Consultant Association	2019	10.1177/0890334418812026	PubMed	Spain											1			1
Seigel JK	Economic impact of human milk on medical charges of extremely low birth weight infants.	Seigel, J. K., Tanaka, D. T., Goldberg, R. N., Smith, P. B., Cotten, C. M., & Bidegain, M.	Seigel, J. K., Tanaka, D. T., Goldberg, R. N., Smith, P. B., Cotten, C. M., & Bidegain, M.	Breastfeeding medicine : the official journal of the Academy of Breastfeeding Medicin	2014	10.1089/bfm.2013.0059	PubMed	United States; ELBW infants											1
Smith	Hospital system costs of artificial infant feeding: estimates for the Australian Capital Territory	Smith JP, Thompson JF, Ellwood DA.	Smith JP, Thompson JF, Ellwood DA. Hospital system costs of artificial infant feeding: estimates for the Australian Capital Territory. Australian and New Zealand journal of public health. 2002 Dec;26(6):543-51.	Australian and New Zealand journal of public health	2002	https://doi.org/10.1111/j.1467-842X.2002.tb00364.x	Renfrew et al 2012 study reference	Australia	1	1	1	1													1
Straub N	Economic impact of breast-feeding-associated improvements of childhood cognitive development, based on data from the ALSPAC.	Straub, N., Grunert, P., Northstone, K., & Emmett, P.	Straub, N., Grunert, P., Northstone, K., & Emmett, P. (2019). Economic impact of breast-feeding-associated improvements of childhood cognitive development, based on data from the ALSPAC. The British journal of nutrition, 122(s1), S16–S21. https://doi.org/10.1017/S0007114515001233	The British Journal of Nutrition	2019	10.1017/S0007114515001233	PubMed	UK					1
Stuebe AM	An Online Calculator to Estimate the Impact of Changes in Breastfeeding Rates on Population Health and Costs	Stuebe, A. M., Jegier, B. J., Schwarz, E. B., Green, B. D., Reinhold, A. G., Colaizy, T. T., Bogen, D. L., Schaefer, A. J., Jegier, J. T., Green, N. S., & Bartick, M. C.	Stuebe, A. M., Jegier, B. J., Schwarz, E. B., Green, B. D., Reinhold, A. G., Colaizy, T. T., Bogen, D. L., Schaefer, A. J., Jegier, J. T., Green, N. S., & Bartick, M. C. (2017). An Online Calculator to Estimate the Impact of Changes in Breastfeeding Rates on Population Health and Costs. Breastfeeding medicine : the official journal of the Academy of Breastfeeding Medicine, 12(10), 645–658. https:…	Breastfeeding medicine : the official journal of the Academy of Breastfeeding Medicine	2017	10.1089/bfm.2017.0083	PubMed	United States	1	1	1	1		1	1	1	1	1												1	1	1	1	1
Unar-Munguía M	The burden of suboptimal breastfeeding in Mexico: Maternal health outcomes and costs	Unar-Munguía, M., Stern, D., Colchero, M. A., & González de Cosío, T.	Unar-Munguía, M., Stern, D., Colchero, M. A., & González de Cosío, T. (2019). The burden of suboptimal breastfeeding in Mexico: Maternal health outcomes and costs. Maternal & child nutrition, 15(1), e12661. https://doi.org/10.1111/mcn.12661	Maternal & child nutrition	2019	10.1111/mcn.12661	PubMed	Mexico																						1	1	1	1	1
Unar-Munguía M	Economic and disease burden of breast cancer associated with suboptimal breastfeding practices in Mexico	Unar-Munguía, M., Meza, R., Colchero, M. A., Torres-Mejía, G., & de Cosío, T. G.	Unar-Munguía, M., Meza, R., Colchero, M. A., Torres-Mejía, G., & de Cosío, T. G. (2017). Economic and disease burden of breast cancer associated with suboptimal breastfeeding practices in Mexico. Cancer causes & control : CCC, 28(12), 1381–1391. https://doi.org/10.1007/s10552-017-0965-0	Cancer causes & control : CCC	2017	10.1007/s10552-017-0965-0	PubMed	Mexico																						1
Walters D	The cost of not breastfeeding: global results from a new tool.	Walters, D. D., Phan, L., & Mathisen, R.	Walters, D. D., Phan, L., & Mathisen, R. (2019). The cost of not breastfeeding: global results from a new tool. Health policy and planning, 34(6), 407–417. https://doi.org/10.1093/heapol/czz050	Health policy and planning	2019	10.1093/heapol/czz050	PubMed	Global (East Asia and Pacific; Europe and Central Asia; Middle East and North Africa; Latin America and Carribean; North America; South Asia; Sub-Sharan Africa)							1			1			1									1	1	1			1	1
Walters D	The cost of not breastfeeding in Southeast Asia	Walters, D., Horton, S., Siregar, A. Y., Pitriyan, P., Hajeebhoy, N., Mathisen, R., Phan, L. T., & Rudert, C.	Walters, D., Horton, S., Siregar, A. Y., Pitriyan, P., Hajeebhoy, N., Mathisen, R., Phan, L. T., & Rudert, C. (2016). The cost of not breastfeeding in Southeast Asia. Health policy and planning, 31(8), 1107–1116. https://doi.org/10.1093/heapol/czw044	Health policy and planning	2016	10.1093/heapol/czw044	PubMed	Southeast Asia (Cambodia, Indonesia, Laos, Myanmar, Thailand, Timor-Leste, VietNam	1				1							1	1									1
Weimer	The economic benefits of breastfeeding: A review and analysis.	Weimer, JP	Weimer JP. The economic benefits of breastfeeding: A review and analysis. Food Review 24(2)	Food Review	2001		Renfrew et al 2012 study reference	US	1		1	1
Wight	Donor human milk for preterm infants	Wright, N. E.	Wight, N. E. (2001). Donor human milk for preterm infants. Journal of Perinatology, 21(4), 249-254.		2001	https://doi.org/10.1038/sj.jp.7200533	Renfrew et al 2012 study reference	US				1
	highlighted studies are costing studies from the Renfrew et al 2012 study
